# Supplementary material for: The metalloprotein YhcH is an anomerase providing N-acetylneuraminate aldolase with the open form of its substrate
Source: PubMed Central journal article supplement (PMC8141875; doi:10.1016/j.jbc.2021.100699), 2021-04-23
Supplement: mmc1.pdf [file mmc1.pdf]

## **The metalloprotein YhcH is an anomerase providing N-acetylneuraminate aldolase with the open form of its substrate**

Takfarinas Kentache<sup>1</sup>, Leopold Thabault<sup>2</sup>, Gladys Deumer<sup>3</sup>, Vincent Haufroid<sup>3</sup>, Raphaël Frédérick<sup>2</sup>, Carole L. Linster<sup>4</sup>, Alessio Peracchi<sup>5</sup>, Maria Veiga-da-Cunha<sup>1</sup>, Guido T. Bommer<sup>1,6</sup>, and Emile Van Schaftingen<sup>1\*</sup>.

\*Emile Van Schaftingen

**Email:** [emile.vanschaftingen@uclouvain.be](mailto:emile.vanschaftingen@uclouvain.be)

### **List of supporting informations:**

Figures S1 to S6

Tables S1 to S2

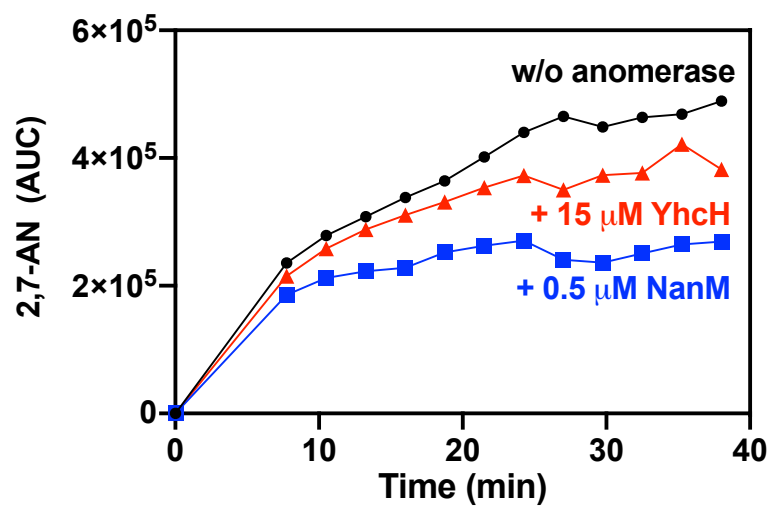

**Fig. S1.** <sup>1</sup>H-NMR data showing the evolution of 2,7-AN in the experiment shown in **Fig. 2D-G**. The amount of 2,7-AN was calculated from the shift of N5-H in the 8 ppm region.



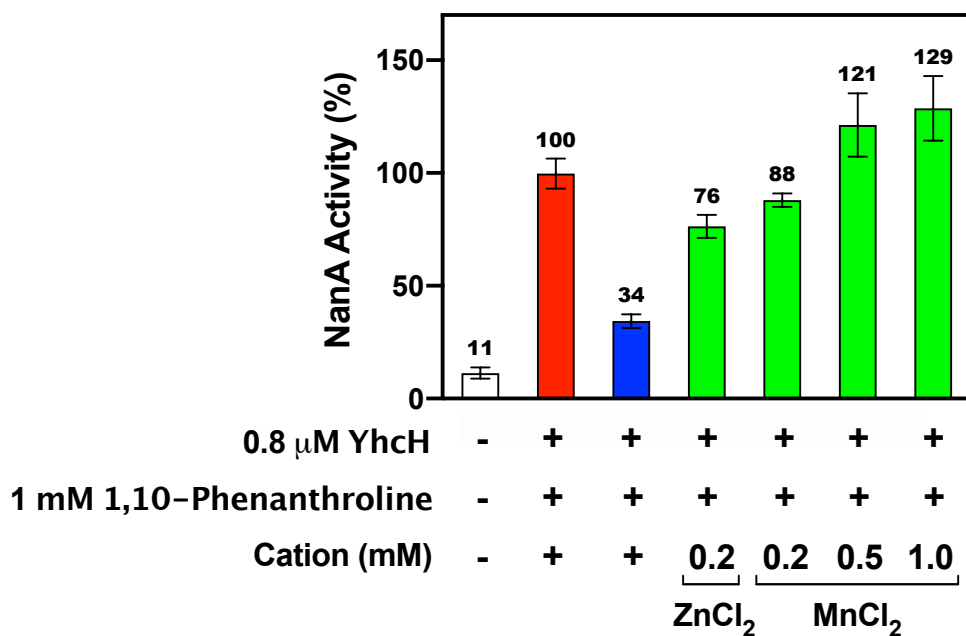

**Fig. S3. Recovery of the 1,10-phenanthroline inhibited YhcH activity with Zn<sup>2+</sup> or Mn<sup>2+</sup>.** The reaction mixture contained 50 mM MES, pH 6.0, 120  $\mu$ M Neu5Ac, 2  $\mu$ M NanA, 0.8  $\mu$ M YhcH, 150  $\mu$ M NADH, 1 mM 1,10-phenanthroline and the indicated concentrations of ZnCl<sub>2</sub> or MnCl<sub>2</sub>. Assays were performed at 20°C. Results shown are means  $\pm$  SD (n=3).

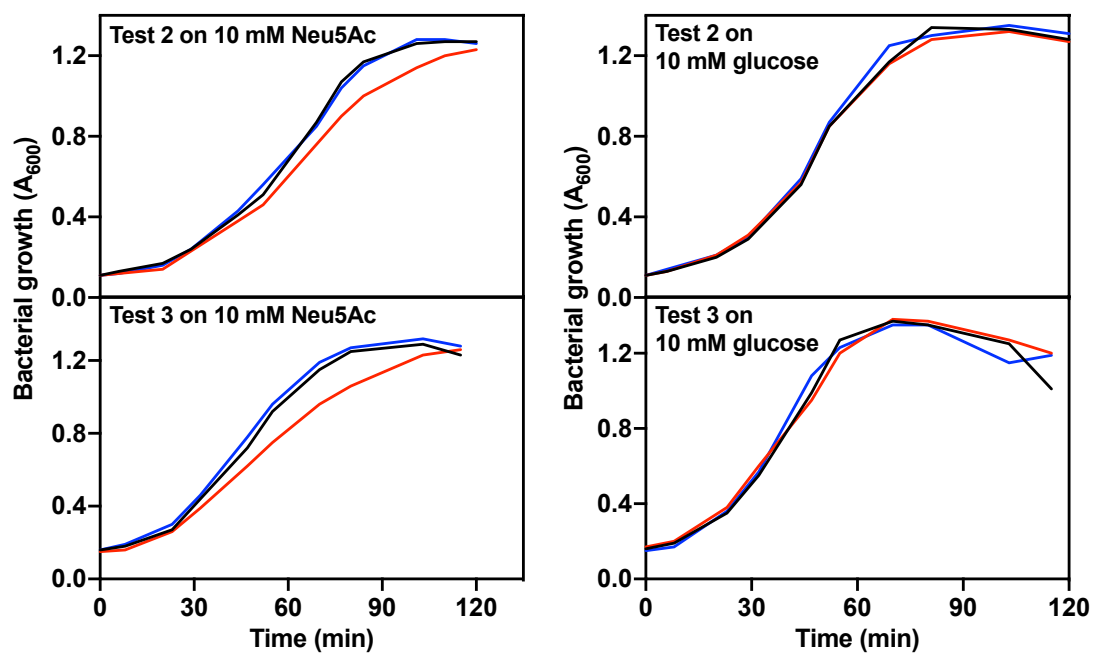

**Fig. S4. Effect of YhcH deficiency on the growth of *E. coli*.** The figure shows the results of two additional independent experiments performed under the same conditions as in Fig. 5A and 5B.

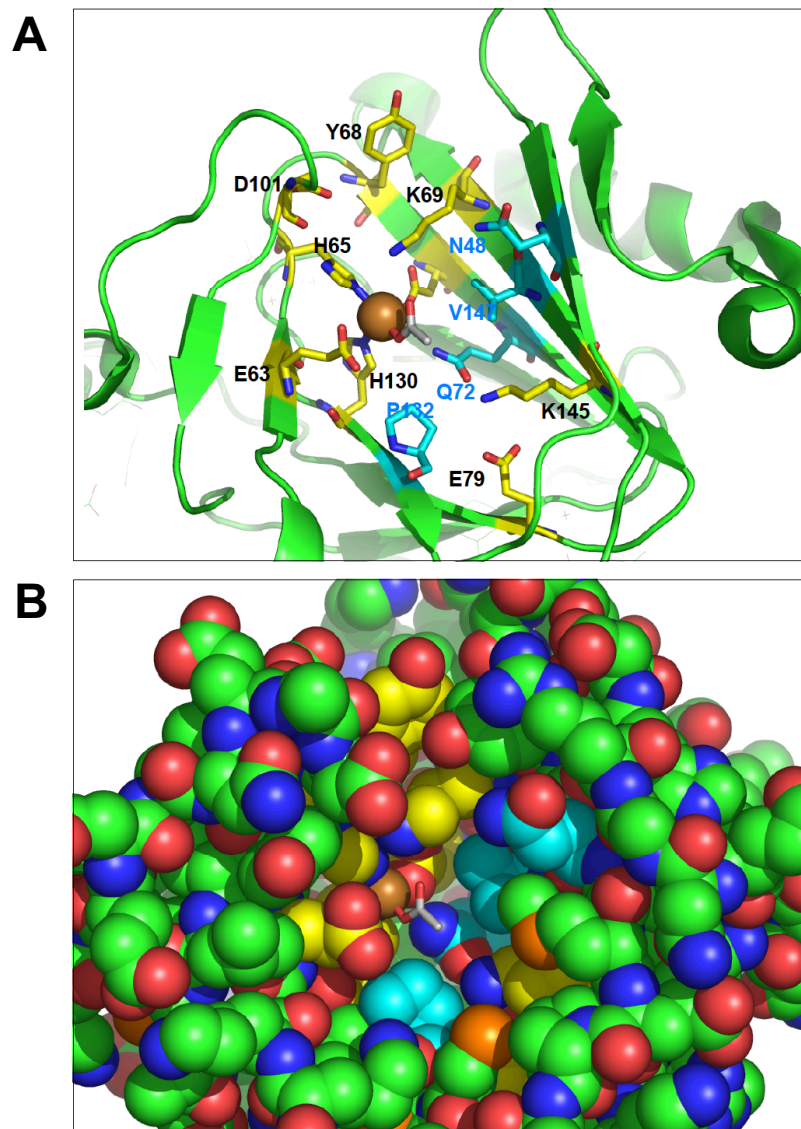

**Fig. S5. Structure of *H. influenzae* 10810 YhcH showing conservation of the residues in the putative catalytic site.** See ref (1) for the structure of *H. influenzae* YhcH. **A.** Cartoon model showing the strictly conserved residues in the alignment presented in Fig. S6 as yellow sticks and the highly conserved residues of the putative catalytic site in cyan. The copper is shown as a brown sphere and the bound acetate in grey sticks. **B.** Space filling representation of the same region showing that the putative catalytic site is open. Drawn with PyMol Molecular Graphics System 2.0 (2).



**Table S1. Metal content of different preparations of YhcH and of other proteins.** The growth condition is indicated. Values were expressed in mol of metal/mol of protein. Abbreviation: ec: *E. coli*, hi: *H. influenzae*

| <b>Protein</b> | <b>Growth condition</b>                                     | <b>Mn<sup>2+</sup></b> | <b>Ni<sup>2+</sup></b> | <b>Cu<sup>2+</sup></b> | <b>Zn<sup>2+</sup></b> |
|----------------|-------------------------------------------------------------|------------------------|------------------------|------------------------|------------------------|
| <b>ecYhcH</b>  | <b>LB</b>                                                   | <b>0.021</b>           | <b>0.061</b>           | <b>0.051</b>           | <b>0.41</b>            |
|                | <b>LB + 80 μM CuCl<sub>2</sub></b>                          | <b>0.015</b>           | <b>0.044</b>           | <b>0.055</b>           | <b>0.467</b>           |
|                | <b>LB + 30 μM ZnCl<sub>2</sub></b>                          | <b>0.021</b>           | <b>0.039</b>           | <b>0.043</b>           | <b>1.133</b>           |
|                | <b>LB + 60 μM MnCl<sub>2</sub></b>                          | <b>0.873</b>           | <b>0.052</b>           | <b>0.028</b>           | <b>0.308</b>           |
|                | <b>M9</b>                                                   | <b>0.004</b>           | <b>0.021</b>           | <b>0.022</b>           | <b>0.344</b>           |
|                | <b>M9 + 60 μM MnCl<sub>2</sub></b>                          | <b>0.254</b>           | <b>0.026</b>           | <b>0.009</b>           | <b>0.394</b>           |
|                | <b>M9 + 30 μM ZnCl<sub>2</sub> + 60 μM MnCl<sub>2</sub></b> | <b>0.036</b>           | <b>0.043</b>           | <b>0.008</b>           | <b>1.078</b>           |
|                | <b>M9 + 30 μM ZnCl<sub>2</sub></b>                          | <b>0.039</b>           | <b>0.042</b>           | <b>0.011</b>           | <b>0.887</b>           |
| <b>ecNanM</b>  | <b>M9</b>                                                   | <b>0.011</b>           | <b>0.092</b>           | <b>0.055</b>           | <b>0.044</b>           |
| <b>hiYhcH</b>  | <b>LB</b>                                                   | <b>0.034</b>           | <b>0.019</b>           | <b>0.014</b>           | <b>0.881</b>           |
| <b>ecNanA</b>  | <b>LB</b>                                                   | <b>0.001</b>           | <b>0.026</b>           | <b>0.013</b>           | <b>0.016</b>           |



**Table S2. Occurrence of YhcH and other enzymes of Neu5Ac metabolism in bacterial genomes.** The table was built using data obtained from [www.theseed.org](http://www.theseed.org) (4). Blast searches were performed with the proteins indicated in the top line and the percentage identity and scores are indicated. The identified orf's are indicated with their peg number (abbreviated with a 'p' followed by a number, e.g. p3165) to indicate their relative position in the genome. Genes that are close to other genes involved in sialic acid metabolism are highlighted in cyan, yellow or green. Note that NanM from *Clostridium perfringens*, some other Gram-positive bacteria and *Fusobacterium* are circularly permuted compared to *E. coli* NanM, but that they keep the catalytic residues. Analysis of the sequences by SignalP 5.0 (5) indicates the presence of a signal peptide (SP), indicating that these enzymes are not able to replace YhcH in the cytosol.

The table indicates also that there is only a low degree of amino acid identity between YhcH's from Gram-positive and Gram-negative bacteria. This is reminiscent of the low degree of identity between their N-acetylmannosamine kinases.

Most bacteria capable of metabolizing N-acetylneuraminate possess at least one YhcH homolog that is likely play the role of a Neu5Ac anomerase (see Results). The main exceptions are *Staphylococcus aureus* and *Lactobacillus plantarum*, which do not have any homolog of YhcH (or NanM). In the case of *Vibrio cholerae*, the YhcH homolog shows only a low degree of identity with *E. coli* YhcH, is not present in the Neu5Ac operon and is not conserved in several *Vibrio*'s that are able to metabolize Neu5Ac. It is therefore unlikely to be involved in Neu5Ac metabolism. Of note, *V. cholerae* and many other *Vibrio*'s have two NanM homologs. As previously pointed out (6), one is shorter at its N-terminal extremity than the other one and is missing the predicted signal peptide usually found in NanM homologs. We speculate that the shorter protein is a cytosolic form that replaces YhcH and helps the aldolase to metabolize Neu5Ac.

| Species                                                                                         | Gram         | YhcH<br><i>Escherichia coli</i><br>K12 | NanM<br><i>Escherichia coli</i> K12<br>NanM<br><i>C. perfringens</i> | Sialidase NeuA<br>/NeuB<br><i>Streptococcus</i><br><i>agalactiae</i> 2603VR | NanA Aldolase<br><i>Escherichia coli</i><br>K12 | NanE Epimerase<br><i>Escherichia coli</i><br>K12 | NanK Kinase<br><i>Escherichia coli</i><br>K12 |
|-------------------------------------------------------------------------------------------------|--------------|----------------------------------------|----------------------------------------------------------------------|-----------------------------------------------------------------------------|-------------------------------------------------|--------------------------------------------------|-----------------------------------------------|
| <i>Escherichia coli</i> K12<br><b>Enterobacteriales</b>                                         | <b>Gram-</b> | p3165<br>100 % Sc324                   | p4220<br>100% Sc747<br>SP present                                    | None                                                                        | p3169<br>100% Sc613                             | p3167<br>100% Sc464                              | p3166<br>100% Sc578                           |
| <i>Haemophilus influenzae</i><br>10810<br><b>Pasteurellales</b>                                 | <b>Gram-</b> | p310<br>46 % Sc105<br>isolated         | p210<br>43% sc320<br>SP present                                      | None                                                                        | p200<br>37% Sc200                               | p203<br>61% Sc268                                | p202<br>49% Sc271                             |
| <i>Haemophilus parainfluenzae</i> T3T1<br><b>Pasteurellales</b>                                 | <b>Gram-</b> | p187<br>45% Sc95<br>isolated           | None                                                                 | None                                                                        | p65<br>38% Sc209                                | p68<br>63% Sc279                                 | p67<br>53% Sc284                              |
| <i>Haemophilus somnus</i><br>129PT<br><b>Pasteurellales</b>                                     | <b>Gram-</b> | p732<br>46% Sc108                      | None                                                                 | None                                                                        | p730<br>37% Sc209                               | p734<br>62% Sc279                                | p733<br>49% Sc258                             |
| <i>Pasteurella multocida</i><br>2000<br><b>Pasteurellales</b>                                   | <b>Gram-</b> | p425<br>42% Sc110                      | p418<br>38% Sc233<br>SP present                                      | p1703<br>39% Sc307<br>p959<br>25% Sc37.7                                    | p427<br>37% Sc208                               | p423<br>62% Sc268                                | p424<br>51% Sc263                             |
| <i>Aggregatibacter actionmycetemcomitans</i> D11S-1<br><b>Pasteurellales</b>                    | <b>Gram-</b> | p1947<br>42% Sc104<br>Isolated         | p1484<br>43% Sc304<br>SP present                                     | None                                                                        | p1478<br>37% Sc204                              | p1481<br>59% Sc275                               | p1480<br>50% Sc272                            |
| <i>Actinobacillus pleuropneumonie</i> serovar 1 str 4074, 2e sequence,<br><b>Pasteurellales</b> | <b>Gram-</b> | p771<br>49% Sc102                      | None                                                                 | None                                                                        | p1884<br>36% Sc197                              | p1882<br>60% Sc265                               | p1883<br>51% Sc275                            |

| Species                                                                              | Gram  | YhcH<br><i>Escherichia coli</i><br>K12                                | NanM<br><i>Escherichia coli</i> K12<br>NanM<br><i>C. perfringens</i> | Sialidase NeuA<br>/NeuB<br><i>Streptococcus</i><br><i>agalactiae</i> 2603VR       | NanA Aldolase<br><i>Escherichia coli</i><br>K12 | NanE Epimerase<br><i>Escherichia coli</i><br>K12 | NanK Kinase<br><i>Escherichia coli</i><br>K12                        |
|--------------------------------------------------------------------------------------|-------|-----------------------------------------------------------------------|----------------------------------------------------------------------|-----------------------------------------------------------------------------------|-------------------------------------------------|--------------------------------------------------|----------------------------------------------------------------------|
| <i>Vibrio cholerae</i><br>12129(1)<br><b>Vibrionales</b>                             | Gram- | None                                                                  | p2304<br>35% sc220<br>SP present<br>p2305<br>30% sc177<br>SP absent  | p2295<br>28% Sc47                                                                 | p2302<br>29% Sc 105                             | p2298<br>57% Sc242                               | p2297<br>41% Sc202                                                   |
| <i>Yersinia pestis</i> 2501<br><b>Enterobacteriales</b>                              | Gram- | p1649<br>47 % Sc 28                                                   | p621<br>39% Sc269<br>SP present                                      | None                                                                              | p1654<br>28% Sc269                              | p1653<br>61% Sc198                               | p1650<br>50% sc269                                                   |
| <i>Gallibacterium anatis</i><br>UMN179<br><b>Pasteurellales</b>                      | Gram- | p2241<br>45% Sc60                                                     | p1662<br>42% Sc307<br>SP present                                     | None                                                                              | p2243<br>36% Sc213                              | p2239<br>59% Sc265                               | p2240<br>51% Sc276                                                   |
| <i>Fusobacterium nucleatum</i><br>animalis 11_3_2<br><b>Fusobacteriales</b>          | Gram- | p177<br>27% Sc60 Yhch<br><i>E. coli</i><br>35% Sc90 YhcH<br>S. p 1566 | p1340<br>26% Sc91<br>50% Sc333<br>Circularly permuted<br>SP present  | None                                                                              | p1345<br>34%                                    | p1346<br>38%                                     | p1344<br>30%                                                         |
| <i>Fusobacterium</i><br><i>gonidiaformans</i><br>ATCC25563<br><b>Fusobacteriales</b> | Gram- | p325<br>30% Sc54                                                      | p318<br>28% sc86<br>47 % Sc328<br>Circularly permuted<br>SP present  | None                                                                              | p323<br>36% Sc209                               | p324<br>40% sc177                                | p322<br>34% Sc55                                                     |
| <i>Selenomonas fluaggei</i><br>ATCC43531<br><b>Selenomonadales</b>                   | Gram- | p1387<br>30% sc65                                                     | p1389<br>31% Sc65<br>44 %<br>Circularly permuted<br>SP present       | None                                                                              | p1385<br>36% Sc203                              | p1384<br>43% Sc164                               | p1388<br>27% Sc61                                                    |
| <i>Streptococcus pneumoniae</i><br>Pneumoniae D39<br><b>Lactobacillales</b>          | Gram+ | p1615<br>29% Sc62.8<br>p1626<br>29% Sc48.5                            | p1274<br>22% Sc53<br>27 % Sc109<br>Circularly permuted<br>SP absent  | p1628<br>NeuA 100% sc2107<br>p1622<br>NeuB 100% sc1431                            | p1610<br>30% Sc112<br>p1265<br>31% Sc112        | p1620<br>38% Sc146<br>p1275<br>38% Sc141         | p1609<br>26 % Sc66                                                   |
| <i>Streptococcus pneumoniae</i><br>TIGR4<br><b>Lactobacillales</b>                   | Gram+ | p1566<br>26% Sc60<br>p1577<br>29% Sc46<br>p1232<br>26% Sc45           | None                                                                 | p2312<br>NeuA 99 % Sc1649<br>p1573<br>NeuB 99% Sc1424<br>p1231<br>NeuC 99% Sc1513 | p1562<br>32%Sc154<br>p1234<br>31% Sc169         | p1571<br>38% Sc142<br>p1235<br>41%Sc144          | p1561<br>26% Sc66<br>p1229<br>NanK but not<br>accessible by<br>BLAST |
| <i>Streptococcus pyogenes</i><br>ATCC10782<br><b>Lactobacillales</b>                 | Gram+ | p1566<br>30% Sc61.6                                                   | None                                                                 | None                                                                              | p1564<br>31% Sc154                              | p1570<br>37% Sc 131                              | p1563<br>27% Sc 72.8                                                 |

| Species                                                              | Gram                | YhcH<br><i>Escherichia coli</i><br>K12                    | NanM<br><i>Escherichia coli</i> K12<br>NanM<br><i>C. perfringens</i> | Sialidase NeuA<br>/NeuB<br><i>Streptococcus</i><br><i>agalactiae</i> 2603VR | NanA Aldolase<br><i>Escherichia coli</i><br>K12 | NanE Epimerase<br><i>Escherichia coli</i><br>K12 | NanK Kinase<br><i>Escherichia coli</i><br>K12 |
|----------------------------------------------------------------------|---------------------|-----------------------------------------------------------|----------------------------------------------------------------------|-----------------------------------------------------------------------------|-------------------------------------------------|--------------------------------------------------|-----------------------------------------------|
| <i>Clostridium perfringens</i><br>ATCC 13124<br><b>Clostridiales</b> | <b>Gram+</b>        | p167<br>28 % Sc62                                         | p695<br>27 % Sc93<br>100%<br>Circularly permuted<br>SP present       | p694<br>NeuA 35% Sc347<br>p511<br>NeuA 32% Sc301                            | p165<br>37% Sc216                               | p164<br>41% Sc158                                | p168<br>24% sc72                              |
| <i>Staphylococcus aureus</i><br>04-02981<br><b>Bacillales</b>        | <b>Gram+</b>        |                                                           | none                                                                 | None                                                                        | p318<br>37 % Sc215                              | p321<br>38%                                      | p319<br>30 %                                  |
| <i>Ruminococcus gnavus</i><br>AGR2154<br><b>Clostridiales</b>        | <b>Gram+</b>        | p2363*<br>27% Sc47.8<br>Not visible in<br>www.theseed.org | None                                                                 | p2358<br>NeuB 42% Sc531                                                     | p2356<br>30% Sc150                              | p2357<br>39% Sc145                               | p2355<br>24% Sc59                             |
| <i>Lactobacillus plantarum</i><br>JDN1<br><b>Lactobacillales</b>     | <b>Gram+</b>        | None                                                      | None                                                                 | None                                                                        | p2880<br>38% Sc200                              | p2881<br>40% Sc113                               | p2879<br>26% Sc42                             |
| <i>Mycoplasma capricolum</i><br>ATCC 27343<br><b>Mycoplasmatales</b> | <b>Non<br/>Gram</b> | p413<br>23% Sc40                                          | None                                                                 | None                                                                        | p411<br>36% Sc205                               | p415<br>37% Sc130                                | p414<br>22% Sc49                              |

## SI Reference

1. A. Teplyakov, G. Obmolova, J. Toedt, M. Y. Galperin, G. L. Gilliland, Crystal Structure of the Bacterial YhcH Protein Indicates a Role in Sialic Acid Catabolism. *J. Bacteriol.* 187, 5520–5527 (2005).
2. W. L. DeLano, Use of PYMOL as a communications tool for molecular science. *Am. Chem. Soc.* 228, 313–314 (2004).
3. F. Sievers, D. G. Higgins, Clustal Omega, accurate alignment of very large numbers of sequences. *Methods Mol. Biol.* Clifton NJ 1079, 105–116 (2014).
4. R. Overbeek, *et al.*, The Subsystems Approach to Genome Annotation and its Use in the Project to Annotate 1000 Genomes. *Nucleic Acids Res.* 33, 5691–5702 (2005).
5. J. J. Almagro Armenteros, *et al.*, SignalP 5.0 improves signal peptide predictions using deep neural networks. *Nat. Biotechnol.* 37, 420–423 (2019).
6. E. Severi, *et al.*, Sialic Acid Mutarotation Is Catalyzed by the *Escherichia coli*  $\beta$ -Propeller Protein YjhT. *J. Biol. Chem.* **283**, 4841–4849 (2008).
